# Supplementary material
Source: PubMed Central journal article supplement (PMC4434718)
Supplement: pnas.201504811SI.pdf [file pnas.201504811SI.pdf]

# Supporting Information

Xie et al. 10.1073/pnas.1504811112

## Measures of Assortative Mating in the Case of Categorical Attributes

In our numerical simulation, we specified the individual attributes,  $X_m$  and  $X_f$ , to be continuous variables. Thus, we used the Pearson correlation coefficient to measure the degree of assortative mating. When individual attributes are categorical variables, such as race or educational attainment, social scientists often use log-linear models or odds-ratio-based summary measures to compare the amount of association across time and space. To illustrate scenarios of this kind, we constructed a categorical version of our simulated data for the encounter mating model with increasing cost of being single. In particular, we cross-classify husbands and wives according to which quintile their attributes, that is,  $X_m$  and  $X_f$ , fall into with respect to the standard normal distribution when 25, 50, 75, and 100% of the population are married. The resulting data take the form of a three-way contingency table as shown in Table S1.

To illustrate the dynamics of assortative mating with the tabular data, we apply the Unidiff model (also known as the log-multiplicative layer effect model) (1), as well as a descriptive measure known as the Altham index (2, 3). The Unidiff model uses a single parameter, called the layer effect, to capture how the degree of row-column association varies across two-way tables. It can be fitted with different forms of row-column association, such as full interaction, row-column association (II), and linear-by-linear association (see ref. 4, chapter 4). Because the Altham index is a summary measure based on the aggregation of individual log odds ratios in a two-way contingency table, it often suffers from large sampling errors. For this reason, we also calculated an adjusted version of the Altham index that capitalizes on empirical Bayes estimates of individual log odds ratios, which can effectively improve estimation efficiency (5). The results are shown in Table S2. All categorical measures of association, as we can see, indicate a rising yet nonlinear trend in assortativeness, consonant with our findings based on the Pearson correlation coefficient.

1. Xie Y (1992) The log-multiplicative layer effect model for comparing mobility tables. *Am Soc Rev* 57(3):380–395.
2. Altham PME, Ferrie P (2007) Comparing contingency tables tools for analyzing data from two groups cross-classified by two characteristics. *Hist Methods* 40(1):3–16.
3. Altham PME (1970) The measurement of association of rows and columns for an  $R \times C$  contingency table. *J R Stat Soc, B* 32(1):63–73.
4. Powers DA, Xie Y (2000) *Statistical Methods for Categorical Data Analysis* (Academic, New York).
5. Zhou X (2015) Shrinkage estimation of log odds ratios for comparing mobility tables. *Sociol Methodol*, in press.
